# Supplementary material for: High-nuclearity silver ethynide clusters containing polynucleating oxygen donor ligands
Source: Royal Society of Chemistry journal article supplement (doi:10.1039/c8dt02700e), 2018-01-01
Supplement: c8dt02700e1.pdf [file c8dt02700e1.pdf]

Supporting Information for

**High-Nuclearity Silver Ethynide Clusters Containing Polynucleating  
Oxygen Donor Ligands**

Jun-Ling Jin, Yun-Peng Xie\* and Xing Lu\*

*State Key Laboratory of Materials Processing and Die & Mould Technology, School  
of Materials Science and Engineering, Huazhong University of Science and  
Technology (HUST), Wuhan 430074, China*

Email: [xieyp@hust.edu.cn](mailto:xieyp@hust.edu.cn) (Y.-P. Xie); [lux@hust.edu.cn](mailto:lux@hust.edu.cn) (X. Lu).

## FT-IR spectrums

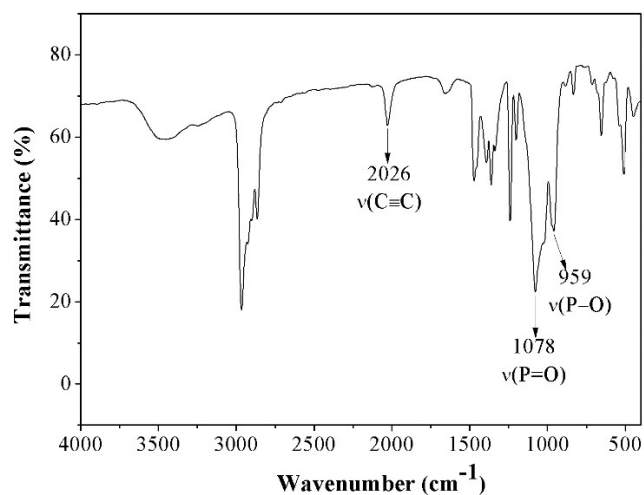

Figure S1. IR spectrum of compound 2.

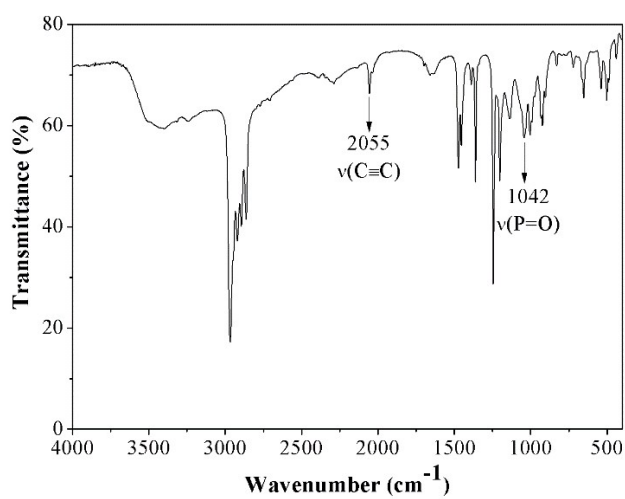

Figure S2. IR spectrum of compound 3.

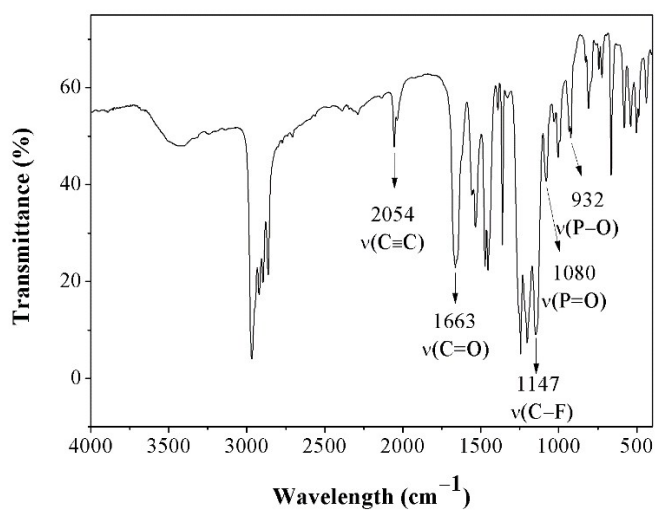

Figure S3. IR spectrum of compound 4.
